# Supplementary material
Source: publisher figshare collection journal article supplement (https://karger.figshare.com/ndownloader/files/17566124)
Supplement: Supplementary file 1 [file 17566124]

**Supplement information**

**Fig. S1**. Flow chart of the study selection process and literature search result.

**Fig. S2A.** Subgroup analysis by study location of the association between EBV infection and increased BC risk.

**Fig. S2B.** Subgroup analysis by tissue type of the association between EBV infection and increased BC risk.

**Fig. S3.** Sensitivity analyses by omitting each study by turn.

**Fig. S4.** Funnel plot for publication bias analysis


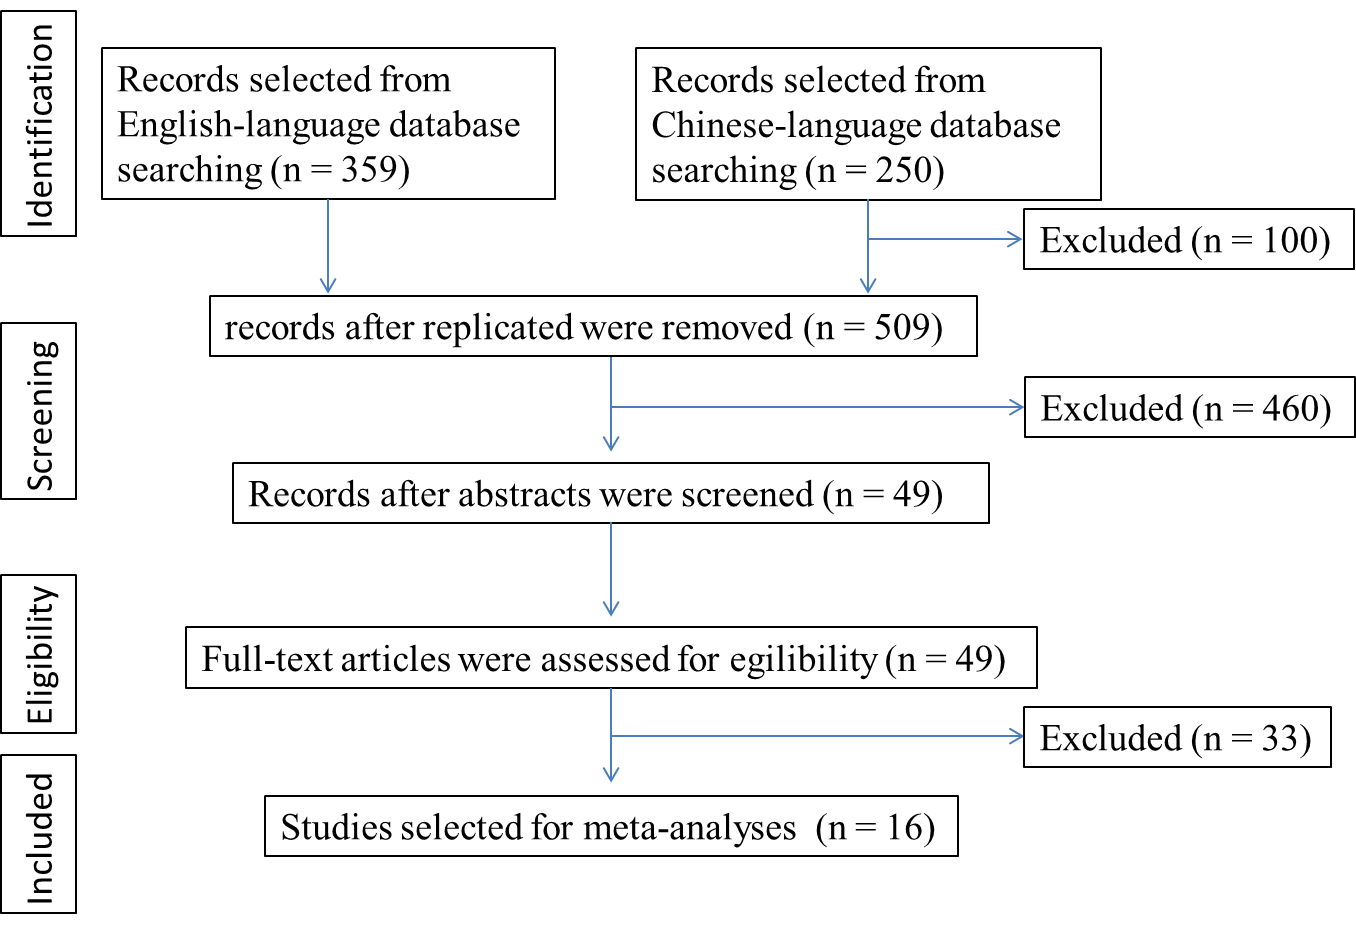


**Fig. S1**

**Fig. S2A**

**Fig. S2B**

**Figure S3**

**Figure S4**
